# Supplementary material for: Clonally expanded γδ T cells protect against Staphylococcus aureus skin reinfection
Source: JCI journal article supplement (doi:10.1172/jci96481), 2018-02-04
Supplement: sd1 [file 1]

## Supplemental Data

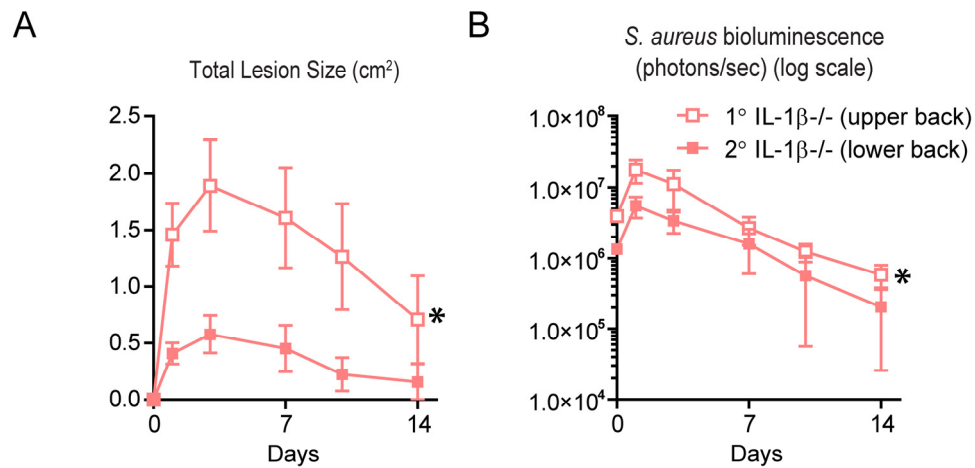

**Supplemental Figure 1.** Protection in IL-1β<sup>-/-</sup> mice is not limited to a specific skin location. The location of skin inoculation of the bacteria were reversed in which the 1° infection was performed in the upper back and the 2° infection performed on lower back (n=5/group). (A) Mean total lesion size (cm<sup>2</sup>) ± SEM. (B) Mean total flux (photon/s) ± SEM. \*P<0.05, as measured by two-way ANOVA.

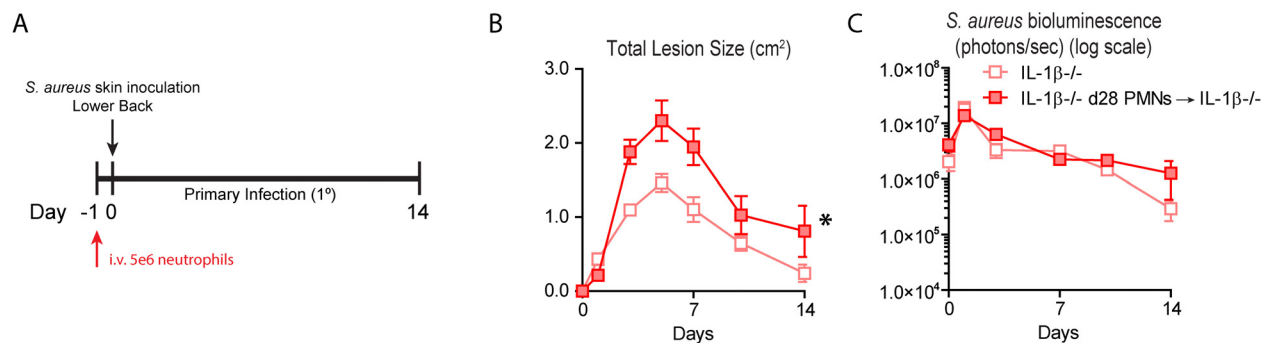

**Supplemental Figure 2.** Neutrophils from previously infected IL-1β<sup>-/-</sup> mice do not confer protection to naïve IL-1β<sup>-/-</sup> mice. (A) Timeline for transfer of neutrophils harvested from day 28 IL-1β<sup>-/-</sup> mice to naïve IL-1β<sup>-/-</sup> mice. (B) Mean total lesion size (cm<sup>2</sup>) ± SEM. (C) Mean total flux (photon/s) ± SEM. \*P<0.05, as measured by two-way ANOVA.

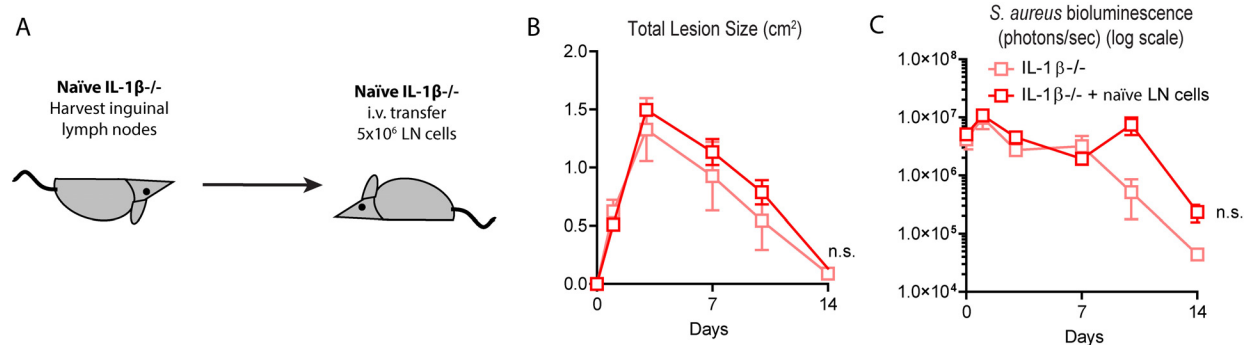

**Supplemental Figure 3.** Transfer of naïve lymph node cells from IL-1 $\beta$ <sup>-/-</sup> mice do not confer protection. (A) Timeline of harvesting and transferring of 5  $\times$  10<sup>6</sup> lymph node cells from naïve IL-1 $\beta$ <sup>-/-</sup> mice into naïve IL-1 $\beta$ <sup>-/-</sup> recipients (n=5/group). (B) Mean total lesion size (cm<sup>2</sup>)  $\pm$  SEM. (C) Mean total flux (photon/s)  $\pm$  SEM.

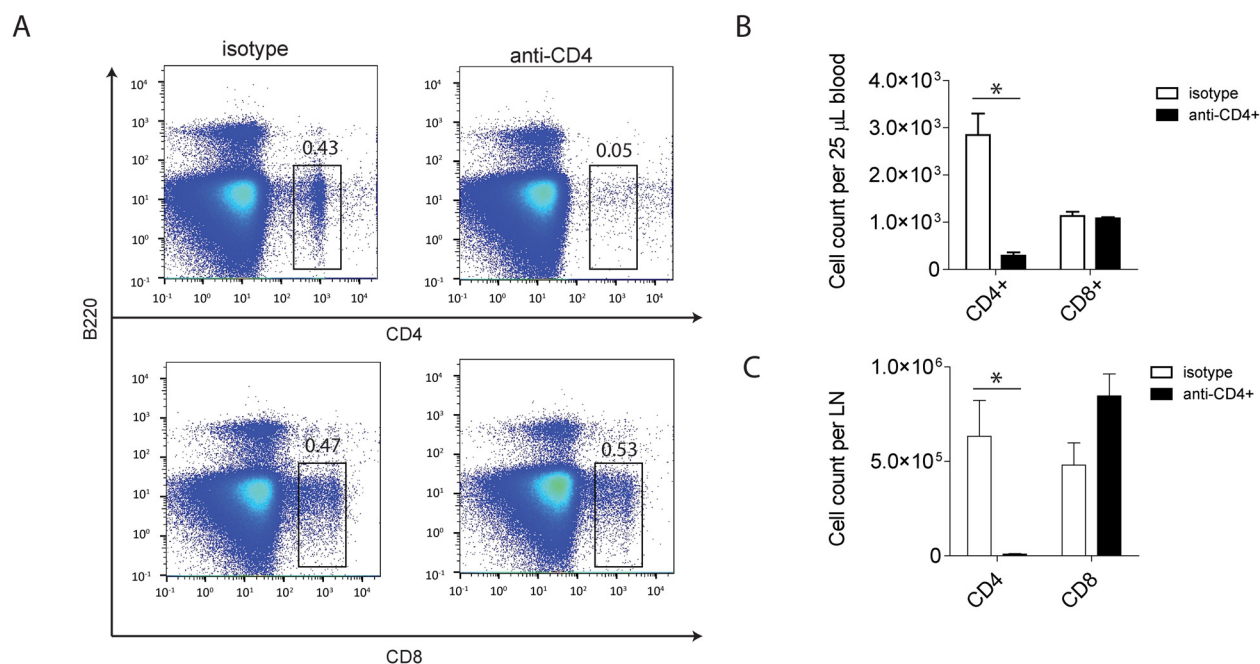

**Supplemental Figure 4.** Anti-CD4 antibody selectively depletes CD4<sup>+</sup> T cells. (A,B) Representative flow plots (A) and mean percentages of CD4<sup>+</sup> and CD8<sup>+</sup> T cells  $\pm$  SEM in peripheral blood (B) and lymph nodes (LNs) (C) following isotype or anti-CD4 antibody treatment at the experimental endpoint (14 days after *S. aureus* skin inoculation). \**P* < 0.05, as measured by a two-tailed Student's t-test.

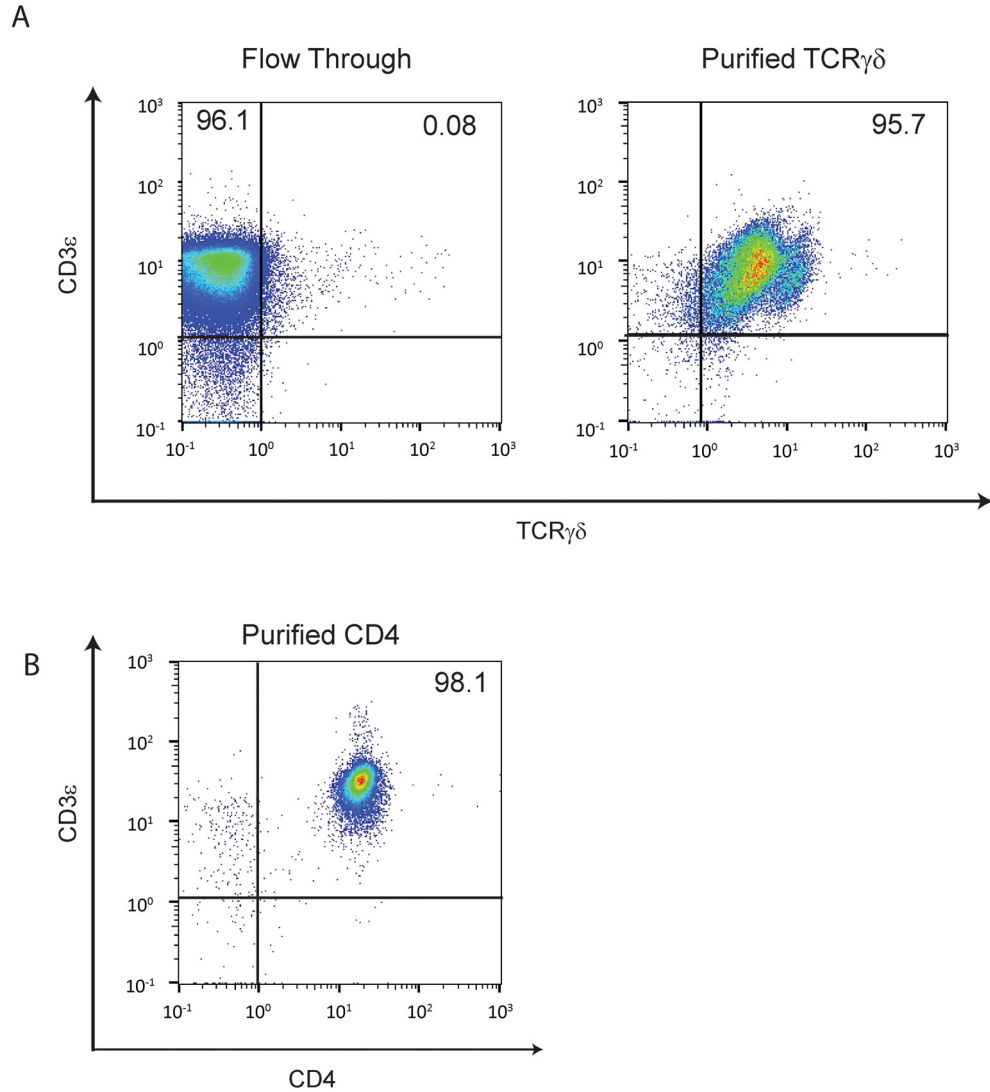

**Supplemental Figure 5.** Purification of  $\gamma\delta$  T cells from lymph nodes harvested on day 28 from previously infected IL-1 $\beta^{-/-}$  mice. (A) Representative flow plots with percentages of TCR $\gamma\delta$ <sup>+</sup> cells in Flow Through or Purified TCR $\gamma\delta$  populations prior to transfer into naïve IL-1 $\beta^{-/-}$  mice. (B) Representative flow plots with percentages of CD4<sup>+</sup> T cells prior to transfer into naïve IL-1 $\beta^{-/-}$  mice.

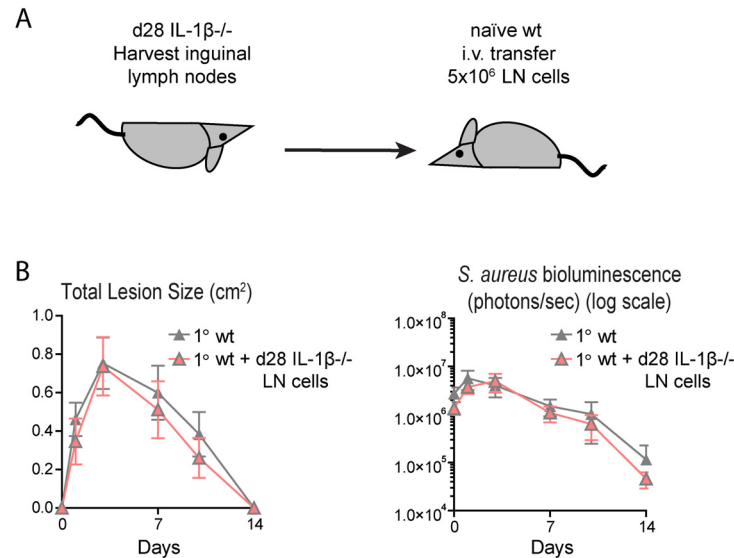

**Supplemental Figure 6.** Transfer of lymph node cells from day 28 IL-1 $\beta$ <sup>-/-</sup> mice does not provide protection to naïve wt mice. (A) Timeline of harvesting and transferring of 5x10<sup>6</sup> lymph node cells from d28 IL-1 $\beta$ <sup>-/-</sup> mice into naïve wt recipients (n=5/group) (B) Mean total lesion size (cm<sup>2</sup>)  $\pm$  SEM. (C) Mean total flux (photon/s)  $\pm$  SEM.

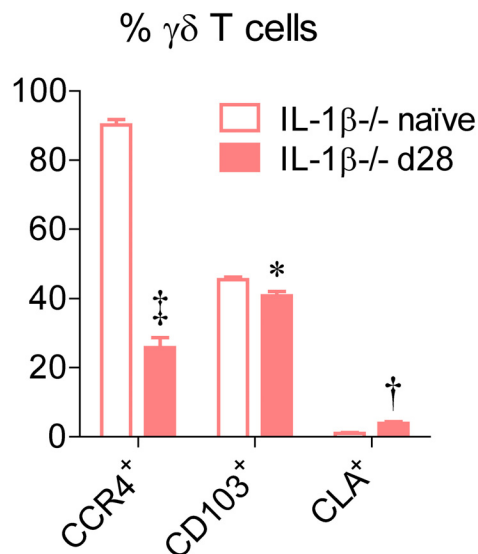

**Supplemental Figure 7.** Expression of homing and adhesion molecules on  $\gamma\delta$  T cells.  $\gamma\delta$  T cells were isolated from naïve and day 28 IL-1 $\beta$ <sup>-/-</sup> mice (n=5/group) and were assessed for CCR4, CD103 and CLA expression by FACS. Mean percentages of CCR4<sup>+</sup>, CD103<sup>+</sup> and CLA<sup>+</sup>  $\gamma\delta$  T cells  $\pm$  SEM. \* $P$  < 0.05, † $P$  < 0.01, ‡ $P$  < 0.001 as measured by a Student's t-test.

| Gene          | Mouse                       | Spearman TRGV5/6 | P value                | Spearman TRDV4 | P value                |
|---------------|-----------------------------|------------------|------------------------|----------------|------------------------|
| <i>SKINT1</i> | IL-1 $\beta$ <sup>-/-</sup> | -0.19            | $3.99 \times 10^{-01}$ | -0.12          | $5.91 \times 10^{-01}$ |
| <i>SKINT3</i> | IL-1 $\beta$ <sup>-/-</sup> | 0.05             | $8.36 \times 10^{-01}$ | -0.06          | $7.82 \times 10^{-01}$ |
| <i>SKINT9</i> | IL-1 $\beta$ <sup>-/-</sup> | -0.18            | $3.85 \times 10^{-01}$ | -0.20          | $3.74 \times 10^{-01}$ |
| <i>BTNL2</i>  | IL-1 $\beta$ <sup>-/-</sup> | 0.62             | $2.13 \times 10^{-03}$ | 0.72           | $1.66 \times 10^{-04}$ |

**Supplemental Figure 8.** Spearman correlations of reads mapping to butyrophilin family members with reads mapping to the CDR3-encoding nt sequences of the dominant *TRG*-encoded and *TRD*-encoded CDR3 aa sequences identified in Figure 8B in lymph nodes from IL-1 $\beta$ <sup>-/-</sup> mice. Correlations were assessed between the following butyrophilin family members (*BTNL1A1*, *BTNL1*, *BTNL2*, *BTNL4*, *BTNL6*, *BTNL9*, *BTNL10* and *ERG3*) including the *SKINT* family members (*SKINT1-SKINT11*) and only *BTNL2* had a statistically significant correlation (shown in red). For comparison, the correlations with *SKINT1*, *SKINT3* and *SKINT9* are shown because these butyrophilin family members have been previously implicated as ligands or co-stimulatory molecules for DETCs, which have the same CDR3 aa sequences as the expanded *TRG*-encoded and *TRD*-encoded CDR3 aa sequence identified in Figure 8B.

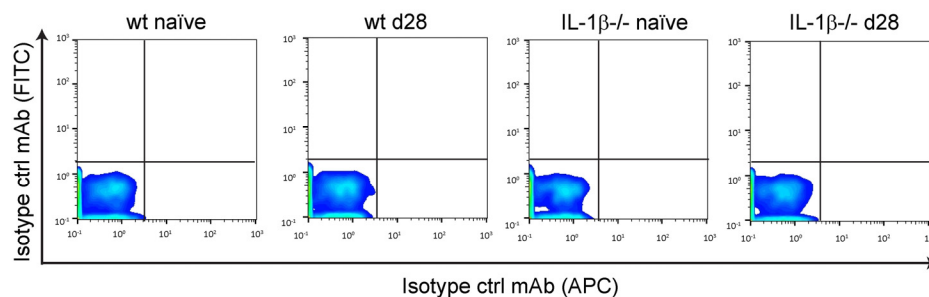

**Supplemental Figure 9.** Representative FACS plots for the isotype control mAbs corresponding to the intracellular staining for anti-IL-17A, anti-IL-22, anti-TNF and anti-IFN $\gamma$  mAbs used in Figure 7A.
